## Special Article

# Senior Medical Students' Knowledge of and Attitudes Toward Anesthesiology in Ten Medical Schools

John G. Bruhn, Ph.D.,\* Burton S. Epstein, M.D.,† Thomas K. Burnap, M.D.‡

THE American Society of Anesthesiologists has sponsored a national preceptorship program in anesthesiology for medical students since 1966. The purpose of the program is to enhance students' understanding of and interest in anesthesiology. An evaluation of the effectiveness of the first five years of the program has been completed.<sup>1</sup> This assessment was limited to students and preceptors who participated in the program. Of further importance, however, is whether students who have participated and those who have not participated in the program differ with respect to knowledge, skills, and attitudes. In order to add this dimension to the evaluation of the program, a survey of senior medical students in ten medical schools in the United States was conducted in 1971.

Three major hypotheses were tested: 1) significantly more of the senior medical students who have participated in the program would respond correctly to a series of questions over basic knowledge areas of anesthesiology than would senior medical students who have not participated in the program; 2) significantly more of the senior medical students who have participated in the program would consider themselves more skilled in these knowledge areas than would senior medical students who have not participated in the program; 3) significantly more of the senior medical students who have participated in the program would

have positive attitudes toward the specialty and consider it as a specialty choice than would senior medical students who have not participated in the program.

### Methods

A questionnaire was designed by members of the Medical Student Preceptorship Committee of the American Society of Anesthesiologists (ASA) and the senior author. The questionnaire was composed of a series of brief clinical situations which required students to select the action they would take in the situation from a list of alternatives. The situations elicited student's knowledge of endotracheal intubation, lumbar puncture, regional anesthesia, management of shock, positive-pressure ventilation and pharmacologic interaction. Students were also asked to indicate the adequacy (very adequate, adequate, not adequate) of their skill in dealing with each type of clinical situation. In addition, students were asked to indicate the primary source (department and service) of their knowledge and skill regarding the situation.

Additional questions were asked regarding changes in students' attitudes toward anesthesiology during medical school, major factors that influenced their attitude toward the specialty, and their interest in the specialty as a career choice.

The ten medical schools were selected to ensure regional representation, and all were schools which had contributed students to the program. The senior class president in each school was contacted by the ASA to elicit his cooperation in assembling his class to take the survey and a reward was offered to those senior classes which achieved the highest percentage

\* Associate Dean for Community Affairs, The University of Texas Medical Branch at Galveston, Galveston, Texas 77550.

† Professor, Department of Anesthesiology, George Washington University Medical Center, Washington, D.C. 20037.

‡ Department of Anesthesiology, Boston Hospital for Women, 245 Pond Avenue, Brookline, Massachusetts 02146.

TABLE 1. Responses of Senior Medical Students to Survey, by Medical School

| Medical School                          | Number of Seniors Who Were Not Preceptees | Number of Seniors Who Were Former Preceptees | Per Cent Preceptee Response | Per Cent of Total Response |
|-----------------------------------------|-------------------------------------------|----------------------------------------------|-----------------------------|----------------------------|
| George Washington                       | 97                                        | 8                                            | 63                          | 83                         |
| Jefferson                               | 152                                       | 8                                            | 63                          | 79                         |
| Southwestern                            | 87                                        | 18                                           | 100                         | 78                         |
| Wisconsin (Marquette)                   | 67                                        | 13                                           | 62                          | 74                         |
| Harvard                                 | 147                                       | 3                                            | 67                          | 61                         |
| Loma Linda                              | 95                                        | 5                                            | 60                          | 60                         |
| Women's Medical College of Philadelphia | 43                                        | 7                                            | 43                          | 58                         |
| UCLA                                    | 99                                        | 1                                            | 100                         | 53                         |
| New York-Dowstate                       | 138                                       | 11                                           | 64                          | 36                         |
| Northwestern                            | 161                                       | 4                                            | 75                          | 33                         |
| TOTAL                                   | 1,086                                     | 78                                           | (Mean 71)                   | (Mean 60)                  |

of participation. The senior class was selected because it was thought that the graduating class would have had more of a chance to participate in whatever anesthesia experience had been offered at the school; however, since few of the senior classes meet as a group, the stipend was offered to assure their participation. A representative of the Department of Anesthesiology coordinated the survey at each school. The purpose of the survey, namely to compare students who had and had not participated in the national preceptorship program, was not known to the students. To enable comparisons to be made between these two groups of students, however, students were asked to sign their names to the questionnaires so that former preceptees could be identified from a master roster. Table 1 lists the medical schools participating in the survey and the student response by school. Six-hundred and ninety-eight, or 60 per cent, of the senior medical students in the ten schools responded. Fifty-five, or 71 per cent, of those seniors who had participated in the preceptorship program returned questionnaires. The remaining 643 seniors had not participated in the program.

### Results

Table 2 presents data relevant to the first hypothesis. The incorrect responses to each of the knowledge questions were combined and compared with the correct response in a Chi-square analysis of each question. There were no statistically significant differences between

students who had and had not participated in the preceptorship program in their correct responses to the six knowledge areas over which they were questioned. As a total group more students gave correct answers to the questions dealing with shock and lumbar puncture (91 and 96 per cent, respectively). As a total group students performed next best on the questions about pharmacologic interaction (63 per cent gave correct answers) and endotracheal intubation (44 per cent gave correct answers). Student performance was poorest on the two questions dealing with regional anesthesia (19 and 33 per cent answered correctly) and the question on positive-pressure ventilation (22 per cent answered correctly).

Table 3 shows the data pertinent to the second hypothesis. Significantly more students who had participated in the preceptorship program than students who had not taken a preceptorship considered their skills in endotracheal intubation and positive-pressure ventilation more adequate. There were no significant differences between the two groups of students regarding their assessment of skills in lumbar puncture, regional anesthesia, the management of shock, and pharmacologic interaction. It is noteworthy that three fourths of both groups of students regarded their skills in regional anesthesia as inadequate and one third of both groups regarded their skills in positive-pressure ventilation as inadequate. These were also the two areas the students performed poorly on in the knowledge section. It should be pointed

TABLE 2. Students in the Program and Students Not in the Program, by Responses in Knowledge Areas of Anesthesiology\*

| Knowledge Area                                                                                                                                                                                                                                                                                                                                                                                                                                                                                                                                                                                                                                                                                                                                                                                         | Students in Program     |                          | Students Not in Program      |                            | Significance |
|--------------------------------------------------------------------------------------------------------------------------------------------------------------------------------------------------------------------------------------------------------------------------------------------------------------------------------------------------------------------------------------------------------------------------------------------------------------------------------------------------------------------------------------------------------------------------------------------------------------------------------------------------------------------------------------------------------------------------------------------------------------------------------------------------------|-------------------------|--------------------------|------------------------------|----------------------------|--------------|
|                                                                                                                                                                                                                                                                                                                                                                                                                                                                                                                                                                                                                                                                                                                                                                                                        | Number                  | Per Cent                 | Number                       | Per Cent                   |              |
| <b>1. Endotracheal intubation</b><br>A patient with severe emphysema becomes cyanotic after morphine. Oxygen is administered by face mask. The patient becomes apneic. The best therapy is:<br>a) discontinue oxygen<br>b) administer carbon dioxide<br>c) insert an endotracheal tube<br>†d) administer oxygen with positive-pressure ventilation                                                                                                                                                                                                                                                                                                                                                                                                                                                     | 5<br>2<br>19<br>29      | 9<br>4<br>35<br>53       | 111<br>46<br>202<br>274      | 17<br>7<br>32<br>43        | NS           |
| <b>2. Lumbar puncture</b><br>An anesthesiologist usually uses the smallest-needle possible for lumbar puncture. This is done to avoid:<br>a) puncture of the spinal cord<br>b) puncture of the dura<br>c) puncture of the nerve root<br>†d) postlumbar-puncture headache                                                                                                                                                                                                                                                                                                                                                                                                                                                                                                                               | 1<br>1<br>2<br>50       | 2<br>2<br>4<br>91        | 9<br>6<br>45<br>577          | 1<br>1<br>7<br>90          | NS           |
| <b>3. Regional anesthesia</b><br><b>Finger laceration</b><br>A. A finger block is done with local anesthetic.<br>You would choose which of the following available agents:<br>a) $\frac{1}{2}\%$ lidocaine with 1:200,000 epinephrine<br>†b) $\frac{1}{2}\%$ lidocaine without epinephrine<br>c) 1% lidocaine with epinephrine<br>d) 2% lidocaine without epinephrine<br>e) 4% lidocaine without epinephrine<br>B. Same abrasion of the hand, requiring debridement and cleaning. An axillary block seems indicated. Which of the following agents would you choose?<br>a) $\frac{1}{2}\%$ lidocaine with 1:200,000 epinephrine<br>b) $\frac{1}{2}\%$ lidocaine without epinephrine<br>†c) 1% lidocaine with epinephrine<br>d) 2% lidocaine without epinephrine<br>e) 4% lidocaine without epinephrine | 3<br>10<br>7<br>34<br>1 | 5<br>18<br>13<br>62<br>2 | 27<br>120<br>140<br>345<br>3 | 4<br>19<br>22<br>54<br>0.5 | NS           |
| <b>4. Shock</b><br>If a patient in shock is found to have a lowered central venous pressure, arterial blood pressure and urinary output, the first treatment that should be instituted is:<br>a) alpha-adrenergic blocking agent<br>b) alpha-adrenergic stimulating agent<br>c) beta-adrenergic blocking agent<br>†d) rapid administration of fluids intravenously                                                                                                                                                                                                                                                                                                                                                                                                                                     | —<br>2<br>—<br>53       | —<br>4<br>—<br>96        | 2<br>18<br>3<br>615          | 0.3<br>3<br>0.5<br>96      | NS           |

TABLE 2. (Continued)

| Knowledge Area                                                                                                                                                                                     | Students in Program |          | Students Not in Program |          | Significance |
|----------------------------------------------------------------------------------------------------------------------------------------------------------------------------------------------------|---------------------|----------|-------------------------|----------|--------------|
|                                                                                                                                                                                                    | Number              | Per Cent | Number                  | Per Cent |              |
| 5. Positive-pressure ventilation<br>In initiating cardiopulmonary resuscitation as a single rescuer, do you:                                                                                       |                     |          |                         |          |              |
| a) ventilate 10 X, heart compression 10 X                                                                                                                                                          | —                   | —        | 4                       | 0.6      | NS           |
| ‡b) ventilate 3 X, heart compression 15 X                                                                                                                                                          | 17                  | 31       | 134                     | 21       |              |
| c) ventilate 1 X, heart compression 5 X                                                                                                                                                            | 27                  | 49       | 395                     | 62       |              |
| d) ventilate 2 X, heart compression 10 X                                                                                                                                                           | 10                  | 18       | 99                      | 15       |              |
| 6. Pharmacologic interaction<br>A hypertensive patient on diuretics and rauwolfia alkaloids is presented for a hysterectomy. Which single laboratory test might warn of problems under anesthesia? |                     |          |                         |          |              |
| ‡a) blood potassium                                                                                                                                                                                | 36                  | 65       | 392                     | 61       | NS           |
| b) blood sodium                                                                                                                                                                                    | 1                   | 2        | 26                      | 4        |              |
| c) urinary VMA                                                                                                                                                                                     | 12                  | 22       | 121                     | 19       |              |
| d) blood volume                                                                                                                                                                                    | 6                   | 11       | 94                      | 15       |              |

\* Unknown responses were excluded from analysis; hence total responses do not always add to N = 698.

† NS = not statistically significant at 0.05 level.

‡ Indicates correct answer to question.

TABLE 3. Students in the Program and Not in the Program by Level of Skill Regarding Selected Clinical Procedures

| How do you consider your skills in*: |               | Students in Program |          | Students Not in Program |          | Significance                              |
|--------------------------------------|---------------|---------------------|----------|-------------------------|----------|-------------------------------------------|
|                                      |               | Number              | Per Cent | Number                  | Per Cent |                                           |
| Endotracheal intubation              | Very adequate | 18                  | 33       | 31                      | 5        | $\chi^2 = 68.87$ ; 2df;<br>$P \leq 0.001$ |
|                                      | Adequate      | 29                  | 53       | 302                     | 47       |                                           |
|                                      | Not adequate  | 8                   | 15       | 308                     | 48       |                                           |
| Lumbar puncture                      | Very adequate | 21                  | 38       | 182                     | 28       | NS                                        |
|                                      | Adequate      | 32                  | 58       | 389                     | 61       |                                           |
|                                      | Not adequate  | 1                   | 2        | 48                      | 11       |                                           |
| Regional anesthesia                  | Very adequate | 1                   | 2        | 10                      | 2        | NS                                        |
|                                      | Adequate      | 12                  | 22       | 100                     | 16       |                                           |
|                                      | Not adequate  | 42                  | 76       | 526                     | 82       |                                           |
| Managing shock                       | Very adequate | 7                   | 13       | 72                      | 11       | NS                                        |
|                                      | Adequate      | 36                  | 65       | 437                     | 68       |                                           |
|                                      | No adequate   | 11                  | 20       | 128                     | 20       |                                           |
| Positive-pressure ventilation        | Very adequate | 10                  | 18       | 41                      | 6        | $\chi^2 = 11.37$ ; 2df;<br>$P \leq 0.01$  |
|                                      | Adequate      | 27                  | 49       | 327                     | 51       |                                           |
|                                      | Not adequate  | 17                  | 31       | 271                     | 42       |                                           |
| Pharmacologic interaction            | Very adequate | 5                   | 9        | 56                      | 9        | NS                                        |
|                                      | Adequate      | 35                  | 64       | 381                     | 59       |                                           |
|                                      | Not adequate  | 15                  | 27       | 200                     | 31       |                                           |

\* Unknown responses were excluded from analysis; hence totals do not always add to N = 698.

TABLE 4. Students in the Program and Not in the Program by Source of Primary Knowledge Regarding Selected Clinical Procedures

| Where did you obtain your primary knowledge regarding: |                   | Students in Program |          | Students Not in Program |          |
|--------------------------------------------------------|-------------------|---------------------|----------|-------------------------|----------|
|                                                        |                   | Number              | Per Cent | Number                  | Per Cent |
| Endotracheal intubation                                | Anesthesiology    | —                   | —        | 266                     | 41       |
|                                                        | Rotation          | 1                   | 2        | 45                      | 7        |
|                                                        | Elective          | —                   | —        | —                       | —        |
|                                                        | Preceptorship     | 46                  | 84       | 19                      | 3        |
|                                                        | Surgery           | —                   | —        | 56                      | 9        |
|                                                        | Rotation          | —                   | —        | 4                       | 0.6      |
|                                                        | Elective          | —                   | —        | 1                       | 0.1      |
|                                                        | Preceptorship     | —                   | —        | —                       | —        |
|                                                        | Internal medicine | —                   | —        | —                       | —        |
|                                                        | Rotation          | 6                   | 11       | 143                     | 22       |
|                                                        | Elective          | —                   | —        | 10                      | 2        |
|                                                        | Preceptorship     | —                   | —        | 1                       | 0.1      |
|                                                        | Pharmacology      | —                   | —        | 21                      | 3        |
| Other rotation                                         | 1                 | 2                   | 44       | 7                       |          |
| Lumbar puncture                                        | Anesthesiology    | —                   | —        | —                       | —        |
|                                                        | Rotation          | 1                   | 2        | 48                      | 7        |
|                                                        | Elective          | 1                   | 2        | 17                      | 3        |
|                                                        | Preceptorship     | 31                  | 56       | 16                      | 3        |
|                                                        | Surgery           | —                   | —        | —                       | —        |
|                                                        | Rotation          | —                   | —        | 19                      | 3        |
|                                                        | Elective          | —                   | —        | 3                       | 0.005    |
|                                                        | Preceptorship     | —                   | —        | —                       | —        |
|                                                        | Internal medicine | —                   | —        | —                       | —        |
|                                                        | Rotation          | 20                  | 36       | 415                     | 65       |
|                                                        | Elective          | —                   | —        | 19                      | 3        |
|                                                        | Preceptorship     | —                   | —        | 4                       | 0.006    |
|                                                        | Other rotation    | 2                   | 4        | 92                      | 14       |
| Regional anesthesia                                    | Anesthesiology    | —                   | —        | 207                     | 32       |
|                                                        | Rotation          | 1                   | 2        | 22                      | 5        |
|                                                        | Elective          | —                   | —        | —                       | —        |
|                                                        | Preceptorship     | 30                  | 55       | 14                      | 2        |
|                                                        | Surgery           | —                   | —        | —                       | —        |
|                                                        | Rotation          | 12                  | 22       | 205                     | 32       |
|                                                        | Elective          | —                   | —        | 16                      | 2        |
|                                                        | Preceptorship     | —                   | —        | 1                       | 0.001    |
|                                                        | Internal medicine | —                   | —        | —                       | —        |
|                                                        | Rotation          | 1                   | 2        | 12                      | 2        |
|                                                        | Elective          | —                   | —        | 2                       | 0.003    |
|                                                        | Preceptorship     | —                   | —        | 1                       | 0.001    |
|                                                        | Pharmacology      | 5                   | 9        | 36                      | 6        |
| Other rotation                                         | 5                 | 9                   | 53       | 8                       |          |
| Managing shock                                         | Anesthesiology    | —                   | —        | 11                      | 2        |
|                                                        | Rotation          | —                   | —        | —                       | —        |
|                                                        | Elective          | 2                   | 4        | 10                      | 2        |
|                                                        | Preceptorship     | 7                   | 13       | 4                       | 0.006    |
|                                                        | Surgery           | —                   | —        | —                       | —        |
|                                                        | Rotation          | 25                  | 45       | 261                     | 41       |
|                                                        | Elective          | 1                   | 2        | 12                      | 2        |
|                                                        | Preceptorship     | —                   | —        | 3                       | 0.004    |
|                                                        | Internal medicine | —                   | —        | —                       | —        |
|                                                        | Rotation          | 14                  | 25       | 262                     | 41       |
|                                                        | Elective          | 1                   | 2        | 21                      | 3        |
|                                                        | Preceptorship     | —                   | —        | 1                       | 0.001    |
|                                                        | Pharmacology      | —                   | —        | 14                      | 2        |
| Other rotation                                         | 4                 | 7                   | 21       | 3                       |          |

TABLE 4.—(Continued)

| Where did you obtain your primary knowledge regarding: |                   | Students in Program |          | Students Not in Program |          |
|--------------------------------------------------------|-------------------|---------------------|----------|-------------------------|----------|
|                                                        |                   | Number              | Per Cent | Number                  | Per Cent |
| Positive-pressure ventilation                          | Anesthesiology    |                     |          |                         |          |
|                                                        | Rotation          | 3                   | 5        | 232                     | 36       |
|                                                        | Elective          | 5                   | 9        | 44                      | 7        |
|                                                        | Preceptorship     | 28                  | 51       | 20                      | 3        |
|                                                        | Surgery           |                     |          |                         |          |
|                                                        | Rotation          | 2                   | 4        | 73                      | 11       |
|                                                        | Elective          | 1                   | 2        | 7                       | 1        |
|                                                        | Preceptorship     | —                   | —        | 3                       | 0.004    |
|                                                        | Internal medicine |                     |          |                         |          |
|                                                        | Rotation          | 13                  | 25       | 170                     | 26       |
| Elective                                               | —                 | —                   | 19       | 3                       |          |
| Preceptorship                                          | —                 | —                   | 1        | 0.001                   |          |
| Other rotation                                         | —                 | —                   | 39       | 6                       |          |
| Pharmacologic interaction                              | Anesthesiology    |                     |          |                         |          |
|                                                        | Rotation          | 2                   | 4        | 37                      | 6        |
|                                                        | Elective          | —                   | —        | 4                       | 0.006    |
|                                                        | Preceptorship     | 5                   | 9        | 4                       | 0.006    |
|                                                        | Surgery           |                     |          |                         |          |
|                                                        | Rotation          | 2                   | 4        | 26                      | 4        |
|                                                        | Elective          | —                   | —        | —                       | —        |
|                                                        | Preceptorship     | —                   | —        | —                       | —        |
|                                                        | Internal medicine |                     |          |                         |          |
|                                                        | Rotation          | 14                  | 25       | 218                     | 34       |
|                                                        | Elective          | 1                   | 2        | 10                      | 2        |
|                                                        | Preceptorship     | —                   | —        | 1                       | 0.001    |
|                                                        | Pharmacology      | 31                  | 56       | 290                     | 45       |
| Other rotation                                         | —                 | —                   | 12       | 2                       |          |

\* Unknown responses were excluded; hence totals do not always add to  $N = 698$ .

out, however, that because this was a national survey it was impossible to obtain an assessment of students' clinical skills other than their own. In addition, the inadequacy of skills in regional anesthesia is undoubtedly attributable to the guidelines provided to preceptors instructing them not to allow students to perform spinal anesthesia or regional blocks.

Table 4 shows the departments and services where students said they obtained their primary knowledge of endotracheal intubation, lumbar puncture, regional anesthesia, the management of shock, positive-pressure ventilation, and pharmacologic interaction. Regarding endotracheal intubation, the majority of students in the preceptorship program said that they obtained this knowledge during that experience, while the majority of students not in the program gained their knowledge of endotracheal intubation during their anesthesiology or internal medicine rotations. Students in the preceptorship program gained their knowledge of lumbar puncture during the preceptorship

or during internal medicine rotations; the majority of students not in the preceptorship program indicated the internal medicine rotation as their source of knowledge regarding lumbar puncture. The majority of students in the preceptorship program indicated the preceptorship or surgery rotation as their source of knowledge about regional anesthesia, while most students not in the program obtained this knowledge during rotations in anesthesiology or surgery. Students in the preceptorship program obtained their knowledge about the management of shock primarily from their internal medicine or surgery rotations, as did the majority of students not in the preceptorship program. Students in the preceptorship program learned about positive-pressure ventilation during this experience or during their internal medicine rotation, while most students not in the program learned this knowledge during their rotations in anesthesiology or internal medicine. Regarding pharmacologic interaction, most students in the preceptorship program and stu-

TABLE 5. Students in the Program and Not in the Program by Attitude Change  
Toward Anesthesiology and Source of Attitudes

|                                                                                                                                                         |                                         | Students in Program |          | Students Not in Program |          | Significance |
|---------------------------------------------------------------------------------------------------------------------------------------------------------|-----------------------------------------|---------------------|----------|-------------------------|----------|--------------|
|                                                                                                                                                         |                                         | Number              | Per Cent | Number                  | Per Cent |              |
| Forgetting about career choice, in general are your ideas about anesthesiology different now from what they were in your early years in medical school? | More positive now                       | 40                  | 73       | 399                     | 62       | NS           |
|                                                                                                                                                         | Still positive                          | 6                   | 11       | 83                      | 13       |              |
|                                                                                                                                                         | More negative now                       | 6                   | 11       | 90                      | 14       |              |
|                                                                                                                                                         | Still negative                          | 3                   | 5        | 61                      | 10       |              |
| What prime factor influenced your attitude toward anesthesiology as a field?                                                                            | Routine exposure to anesthesiology      | —                   | —        | 316                     | 49       | *            |
|                                                                                                                                                         | Routine exposure to surgery             | 1                   | 2        | 83                      | 13       |              |
|                                                                                                                                                         | Anesthesiology elective                 | 3                   | 5        | 88                      | 14       |              |
|                                                                                                                                                         | Surgery elective                        | —                   | —        | 18                      | 3        |              |
|                                                                                                                                                         | Anesthesiology preceptorship            | 50                  | 91       | —                       | —        |              |
|                                                                                                                                                         | Exposure to a specific anesthesiologist | —                   | —        | 96                      | 15       |              |
|                                                                                                                                                         | Other                                   | 1                   | 2        | 24                      | 4        |              |

\* Unknown responses are excluded. The small numbers for some categories of this question did not permit statistical analysis.

dents not in the program learned this information from pharmacology or during their rotation in internal medicine.

Table 5 shows data relevant to the third hypothesis. There was no statistically significant difference between the attitudes of the two groups of students toward anesthesiology; 73 per cent of the seniors who had taken a preceptorship said that their attitudes toward anesthesiology were more positive now than they had been in the early years of medical school; 62 per cent of the seniors who had not participated in the program admitted to more positive attitudes toward the specialty as seniors than as preclinical students. Table 5 also points out that 91 per cent of the seniors who had participated in the program cited the preceptorship as a major factor in influencing their attitude toward anesthesiology, while students who had not participated in the program derived their attitudes toward anesthesiology from several sources: routine exposure to anesthesiology (49 per cent), routine exposure to surgery (13 per cent), anesthesiology elective (14 per cent), surgery elective (3 per cent), exposure to a specific anesthesiologist (15 per cent), and other (4 per cent).

Students' attitudes toward anesthesiology and the major factor influencing their attitudes differed by medical school, as shown in table 6. Greater percentages of students from Schools 6 and 7 had more negative attitudes toward anesthesiology as seniors (34 and 41 per cent, respectively) than did students in the other eight schools. It is noteworthy that 24 per cent of the seniors in School 6 were in the preceptorship program and an additional 21 per cent cited exposure to a specific anesthesiologist as a prime factor in influencing their attitudes toward the specialty. In School 7, on the other hand, students' exposure to anesthesiology was primarily routine (66 per cent). It is noteworthy that while Schools 7 and 8 both had the highest percentages of students with routine exposure to anesthesiologists, the attitudes of more of the seniors in School 7 were negative toward the specialty.

Table 7 provides additional insight into the above differences in students' attitudes among schools. Again, it is noted that greater percentages of students in Schools 6 and 7 said that their clinical experience in anesthesiology unfavorably influenced their attitudes toward the specialty (55 and 57 per cent, respec-

TABLE 6. Student Response by Medical School and Attitudes Toward Anesthesiology

|                                                                                                                                                     | Per Cent Response by Medical School |          |          |          |          |          |          |          |          |           |
|-----------------------------------------------------------------------------------------------------------------------------------------------------|-------------------------------------|----------|----------|----------|----------|----------|----------|----------|----------|-----------|
|                                                                                                                                                     | School 1                            | School 2 | School 3 | School 4 | School 5 | School 6 | School 7 | School 8 | School 9 | School 10 |
| Forgetting about career choice, in general are your ideas about anesthesiology different now than they were in your early years in medical school?* | 77                                  | 67       | 67       | 64       | 66       | 55       | 40       | 60       | 48       | 64        |
| More positive now                                                                                                                                   | 9                                   | 17       | 15       | 19       | 9        | 7        | 2        | 15       | 20       | 11        |
| Still positive                                                                                                                                      | 6                                   | 9        | 11       | 8        | 8        | 34       | 41       | 18       | 15       | 15        |
| More negative now                                                                                                                                   | 5                                   | 6        | 7        | 8        | 15       | 3        | 15       | 7        | 17       | 9         |
| Still negative                                                                                                                                      |                                     |          |          |          |          |          |          |          |          |           |
| What prime factor has influenced your attitude toward anesthesiology as a field?*                                                                   | 51                                  | 31       | 32       | 46       | 52       | 34       | 66       | 73       | 17       | 62        |
| Routine exposure to anesthesiology                                                                                                                  |                                     |          |          |          |          |          |          |          |          |           |
| Routine exposure to surgery                                                                                                                         | 2                                   | 12       | 12       | 14       | 21       | 7        | 9        | 7        | 30       | 5         |
| Anesthesiology elective                                                                                                                             | 3                                   | 9        | 22       | 3        | 8        | 10       | 6        | 3        | 15       | 5         |
| Surgery elective                                                                                                                                    | —                                   | 2        | 1        | 3        | 4        | —        | 4        | —        | 6        | 7         |
| Anesthesiology preceptorship                                                                                                                        | 8                                   | 13       | 23       | 19       | 2        | 24       | 4        | 5        | 17       | 7         |
| Exposure to specific anesthesiologist                                                                                                               | 23                                  | 25       | 9        | 10       | 10       | 21       | 8        | 8        | 6        | 7         |
| Other                                                                                                                                               | 8                                   | 6        | —        | 3        | 2        | 3        | 4        | —        | 4        | 4         |

\* Unknown responses are excluded from analysis. The numerical listing of schools in this table does not correspond to the unnumbered list shown in table 1.

TABLE 7. Student Response by Medical School and Effect of Clinical Experience Attitudes Toward Anesthesiology

|                                                                                                                                | Per Cent Response by Medical School |          |          |          |          |          |          |          |          |           |
|--------------------------------------------------------------------------------------------------------------------------------|-------------------------------------|----------|----------|----------|----------|----------|----------|----------|----------|-----------|
|                                                                                                                                | School 1                            | School 2 | School 3 | School 4 | School 5 | School 6 | School 7 | School 8 | School 9 | School 10 |
| In what way did your clinical experience in anesthesiology affect your attitudes toward anesthesiology?                        | 62                                  | 44       | 62       | 49       | 49       | 11       | 20       | 62       | 44       | 44        |
| Favorable                                                                                                                      | 23                                  | 28       | 26       | 35       | 42       | 55       | 57       | 23       | 33       | 34        |
| Unfavorable                                                                                                                    | 15                                  | 17       | 12       | 15       | 9        | 3        | 15       | 15       | 20       | 18        |
| Unknown                                                                                                                        |                                     |          |          |          |          |          |          |          |          |           |
| Regarding your total experience, evaluate your overall clinical exposure to anesthesiology as to its effect on your attitudes. | 11                                  | 27       | 33       | 8        | 8        | 3        | 15       | 17       | 24       | 16        |
| Favorable                                                                                                                      | 10                                  | 43       | 63       | 59       | 59       | 38       | 32       | 75       | 24       | 24        |
| Unfavorable                                                                                                                    | 28                                  | 29       | 23       | 32       | 34       | 59       | 51       | 8        | 50       | 29        |
| Unknown                                                                                                                        |                                     |          |          |          |          |          |          |          |          |           |



TABLE 8. Students' Consideration of Anesthesiology as a Career Choice by Source of Attitudes Toward the Specialty

|                                                                              | Are you considering anesthesiology as a career choice now? |          |        |          | Total Number |
|------------------------------------------------------------------------------|------------------------------------------------------------|----------|--------|----------|--------------|
|                                                                              | Yes                                                        |          | No     |          |              |
|                                                                              | Number                                                     | Per Cent | Number | Per Cent |              |
| What prime factor influenced your attitude toward anesthesiology as a field? |                                                            |          |        |          |              |
| Routine exposure to anesthesiology                                           | 8                                                          | 17       | 306    | 50       | 314          |
| Routine exposure to surgery                                                  | 1                                                          | 2        | 83     | 14       | 84           |
| Anesthesiology elective                                                      | 14                                                         | 30       | 47     | 8        | 61           |
| Surgery elective                                                             | 1                                                          | 2        | 17     | 2        | 18           |
| Anesthesiology preceptorship                                                 | 11                                                         | 24       | 42     | 7        | 53           |
| Exposure to a specific anesthesiologist                                      | 8                                                          | 17       | 96     | 16       | 104          |
| Other                                                                        | 3                                                          | 6        | 22     | 3        | 25           |
| TOTAL*                                                                       | 46                                                         |          | 613    |          | 659          |

\* Unknown responses are excluded; hence total does not add to  $N = 698$ .

tively). In addition, more students from Schools 6 and 7 evaluated their total experience in anesthesiology as to quality, value, and impact on their attitudes as unfavorable (59 and 51 per cent, respectively). While 50 per cent of the seniors in School 9 also indicated an unfavorable clinical experience in anesthesiology, 45 per cent of the students in this school cited routine exposure to surgery or a surgery elective as influencing their attitudes toward anesthesiology (see table 6).

Table 8 presents further data related to the third hypothesis, namely the influence of the preceptorship on students' career interests in medicine. A greater percentage of the 46 students who said that they were considering anesthesiology as a career choice cited electives (30 per cent) and preceptorships (24 per cent) in anesthesiology as the two prime factors that had influenced their attitude toward the specialty, while 50 per cent of the 613 students who said that they were not considering anesthesiology as a career choice cited routine exposure to anesthesiology as the prime factor that influenced their attitude toward the specialty.

### Discussion

There are several possible explanations for the lack of statistically significant differences between students who had and those who had

not participated in the preceptorship program in terms of their correct responses to the six knowledge areas of anesthesiology. First, several of the questions were not discriminating enough, in that 96 per cent of all students correctly answered the question on lumbar puncture and 91 per cent correctly answered the question on the management of shock. Second, it is reasonable to expect that the two groups of students would not differ in their knowledge of these areas, but rather that preceptorship students would have the opportunity to learn in a one-to-one context and have a greater opportunity to apply their knowledge. The survey instrument did not, however, include questions which explored students' learning environments and their opportunities to apply knowledge. Third, the lack of difference may reflect the fact that the knowledge content of the preceptorship did not differ from the content of anesthesiology taught in the medical school curriculum. Therefore, student responses to the questions may reflect their knowledge of anesthesiology irrespective of where they acquired that knowledge.

Preceptorship students regarded their skills in intubation and positive-pressure ventilation as more adequate than non-preceptorship students. Although preceptorship students regarded their skills in these areas as more adequate than non-preceptorship students, the

former group did not indicate a greater knowledge of these areas.

Preceptorship students primarily acquired knowledge regarding endotracheal intubation during their preceptorship, while non-preceptorship students learned this information during their anesthesiology or internal medicine rotations. However, perhaps more important is the fact that most of the knowledge about anesthesiology over which the students were questioned was acquired on non-anesthesiology services.

There were no relationships between knowledge, the assessment of the adequacy of skills, and students' attitudes toward anesthesiology as a specialty. Indeed, of the four medical schools in which seniors performed best on the knowledge questions, more students in two of these schools had very positive attitudes toward the specialty, while more students in the other two schools had negative attitudes toward the specialty. The type of exposure to anesthesiology as a field varied among medical schools and appeared to be a crucial factor in influencing attitudes. Working with a specific anesthesiologist or in a one-to-one relationship in a preceptorship setting was associated with more positive attitudes toward the specialty than was routine exposure to the field. Nevertheless, routine exposure to anesthesiology was not always associated with negative attitudes. The type of teaching-learning interaction in each anesthesiology department would seem to be a more pervasive factor in influencing student attitudes than solely whether the student learns

anesthesiology through routine exposure, an elective, or a preceptorship.

There are always limitations to survey data, in part because of practical considerations in designing an instrument of reasonable length to ensure greater response and in part because of inability to obtain qualitative data to aid in the interpretation of results. However, the present data do indicate that knowledge and adequacy of skills do not in themselves lead to more positive attitudes toward anesthesiology. Most important is the context in which knowledge is acquired, how it is acquired, and the opportunity to apply it. As these data indicate, the teaching-learning environment for anesthesiology varies among medical schools. Therefore, generalizations about students' knowledge, skills, and attitudes across the ten schools included here undoubtedly obscure many significant factors within each medical school which influence the learning of anesthesiology. The preceptorship is not a panacea, but rather provides an alternative learning environment for medical students, which has been shown to enhance their understanding of the field.<sup>1</sup>

The authors are grateful to Jack Moyers, M.D., for constructive criticism in the formulation of the survey instrument and to Thomas R. Schedler, John J. Prast, and the staff of the American Society of Anesthesiologists for their assistance in carrying out the study.

### Reference

1. Bruhn JC, Burnap TK: Evaluation of the national preceptorship program in anesthesiology 1966-1970. *ANESTHESIOLOGY* 37:79-86, 1972
